1 **Title:** Real world external validation of metabolic gestational age assessment in Kenya

2  
3 Steven Hawken<sup>1,7</sup>  
4 Victoria Ward<sup>2</sup>  
5 A. Brianne Bota<sup>1</sup>  
6 Monica Lamoureux<sup>3</sup>  
7 Robin Ducharme<sup>1</sup>  
8 Lindsay A. Wilson<sup>1</sup>  
9 Nancy Otieno<sup>4</sup>  
10 Stephen Munga<sup>4</sup>  
11 Bryan O. Nyawanda<sup>4</sup>  
12 Raphael Atito<sup>4</sup>  
13 Pranesh Chakraborty<sup>3,5</sup>  
14 Gary L. Darmstadt<sup>2\*</sup>  
15 Kumanan Wilson<sup>1,6,7,8\*</sup>

16  
17 <sup>1</sup>Clinical Epidemiology Program, Ottawa Hospital Research Institute, Ottawa, Canada

18 <sup>2</sup>Prematurity Research Center, Department of Pediatrics, Stanford University School of Medicine,  
19 Stanford CA, USA

20 <sup>3</sup>Newborn Screening Ontario, Children's Hospital of Eastern Ontario, Ottawa, Canada

21 <sup>4</sup>Kenya Medical Research Institute (KEMRI), Center for Global Health Research, Kisumu, Kenya

22 <sup>5</sup>Department of Pediatrics, University of Ottawa, Ottawa, Canada

23 <sup>6</sup>Department of Medicine, University of Ottawa, Ottawa, Canada

24 <sup>7</sup>School of Epidemiology and Public Health, University of Ottawa, Ottawa, Canada

25 <sup>8</sup>Bruyère Research Institute, Ottawa, Canada

26  
27 \*Co-senior authors; these authors contributed equally to this project.

28 **Corresponding author:** Kumanan Wilson ([kwilson@ohri.ca](mailto:kwilson@ohri.ca))

29

30

31 **Keywords:** gestational age algorithm, newborn screening, dried blood spots, LMIC, Kenya, KEMRI

32

33 **Word Count:** 2360

34

35 **Abstract**

36

37 Using data from Ontario Canada, we previously developed machine learning-based algorithms  
38 incorporating newborn screening metabolites to estimate gestational age (GA). The objective of this study  
39 was to evaluate the use of these algorithms in a population of infants born in Siaya county, Kenya.

40 Cord and heel prick samples were collected from newborns in Kenya and metabolic analysis was  
41 carried out by Newborn Screening Ontario in Ottawa, Canada. Postnatal GA estimation models were  
42 developed with data from Ontario with multivariable linear regression using ELASTIC NET regularization.  
43 Model performance was evaluated by applying the models to the data collected from Kenya and comparing  
44 model-derived estimates of GA to reference estimates from early pregnancy ultrasound.

45 Heel prick samples were collected from 1,039 newborns from Kenya. Of these, 8.9% were born  
46 preterm and 8.5% were small for GA. Cord blood samples were also collected from 1,012 newborns. In data  
47 from heel prick samples, our best-performing model estimated GA within 9.5 days overall of reference GA  
48 [mean absolute error (MAE) 1.35 (95% CI 1.27, 1.43)]. In preterm infants and those small for GA, MAE was  
49 2.62 (2.28, 2.99) and 1.81 (1.57, 2.07) weeks, respectively. In data from cord blood, model accuracy slightly  
50 decreased overall (MAE 1.44 (95% CI 1.36, 1.53)). Accuracy was not impacted by maternal HIV status and  
51 improved when the dating ultrasound occurred between 9 and 13 weeks of gestation, in both heel prick and  
52 cord blood data (overall MAE 1.04 (95% CI 0.87, 1.22) and 1.08 (95% CI 0.90, 1.27), respectively).

53 Compared to internal validation performance using Ontario data and to our previously published  
54 external validations, model performance was diminished in the Kenya cohort, suggesting that reference  
55 ultrasound timing is an important factor in model performance. Our study highlights the challenges in  
56 reliably estimating GA in low resource settings, even those with access to dating ultrasound, given that the  
57 timing of dating ultrasound is critical to develop algorithms for accurate estimation of GA based on  
58 metabolic analysis of blood obtained at birth.

59

60

61

62

## 63 **Introduction**

64 The need for novel, non-invasive methods to accurately estimate gestational age (GA) in low resource  
65 settings has been identified by the World Health Organization as a priority area for improving global  
66 estimation of the burden of preterm birth at < 37 completed weeks of gestation. Preterm birth as well as  
67 being born small (small for gestational age; SGA = lowest ten centiles of birthweight given gestational age)  
68 are leading causes of infant mortality and morbidity, particularly in low- and middle-income countries  
69 (LMIC).<sup>1,2</sup> Furthermore, medical needs and developmental milestones differ between term, preterm and SGA  
70 infants and thus, accurately identifying at-risk infants at birth is important in informing their postnatal care  
71 and supportive resources. Although the use of first-trimester ultrasound has improved our ability to estimate  
72 GA<sup>3</sup>, it is not widely available in all low resource settings and its implementation poses significant obstacles,  
73 including cost, training, equipment maintenance and lack of standardization.<sup>4</sup> In low resource settings  
74 without access to prenatal ultrasound, GA estimates are often made based on last menstrual period, the  
75 accuracy of which may be affected by memory recall as well as irregular menses and maternal  
76 malnutrition.<sup>5,6</sup> Commonly used postnatal examination methods for GA dating of infants (e.g., Dubowitz or  
77 Ballard score) also have limitations in terms of their accuracy – particularly in preterm and growth-restricted  
78 infants – and their utility is further limited by challenges with feasibility and high inter-user variability.<sup>7</sup>

79  
80 Given the limitations associated with existing GA dating methods, numerous research groups are testing new  
81 ways to accurately estimate GA.<sup>8-11</sup> We have developed novel machine learning-based algorithms that use  
82 newborn screening metabolites and clinical and demographic covariates to estimate GA.<sup>12,13</sup> These  
83 algorithms were originally developed and internally validated in a large cohort of newborns in Ontario,  
84 Canada.<sup>14,15</sup> Refinements to the algorithms incorporated machine learning and improved the accuracy of  
85 gestational age estimations.<sup>12,16</sup> Here we evaluate the use of these algorithms in a population of infants born  
86 in Siaya County, Kenya.

87

## 88 **Methods**

### 89 *Ethics*

90 This study was approved by the Ottawa Health Sciences Network Research Ethics Board (20180330-01H),  
91 Children’s Hospital of Eastern Ontario Research Ethics Board (18/58X), the Stanford University School of  
92 Medicine Institutional Review Board (44656) and the Kenya Medical Research Institute (KEMRI) Scientific  
93 and Ethics Review Unit (SSC 2880).

94

### 95 *Study setting*

96 A detailed study protocol has previously been published which describes the study sites and provides further  
97 details on sample collection and processing.<sup>17</sup> The Kenya study site is located in Kisumu at the KEMRI  
98 Centre for Global Health Research, with field sites located in Siaya County, where a maternal-infant  
99 demographic surveillance program followed a prospective cohort of pregnant women and their infants in two  
100 community hospitals: Siaya County Referral Hospital (SCRH) and Bondo sub-County Hospital (BSCH).

101 Eligible participants were pregnant women between the ages of 15-49 years, residing within a 10 km radius  
102 of the research facility, willing to deliver in the research hospital, and not planning to relocate within 1 year  
103 of enrollment into the surveillance program. Participants were enrolled at their first antenatal care visit  
104 (ANC-1), which typically occurred prior to 20 weeks' gestation. Participants underwent an early pregnancy  
105 ultrasound as early as possible and were offered treatment for common illnesses, including malaria, urinary  
106 tract infections, and sexually transmitted infections. A small portion of infants were born at home and  
107 evaluated within 72 hours of delivery.

108

#### 109 *Consent*

110 Informed written parental consent was obtained prior to study enrollment. All liveborn infants of enrolled  
111 mothers were eligible for inclusion.

112

#### 113 *Collection of newborn screening specimens*

114 Cord blood samples were collected via syringe within 30 minutes of delivery of the placenta. Four to five  
115 drops of blood from the syringe were applied to filter paper within pre-printed circles. Heel prick samples  
116 were collected from newborns ideally between 24-72 hours after birth, or prior to discharge if the newborn  
117 was released from the hospital within 24 hours of delivery. The newborn's heel was warmed prior to skin  
118 puncture to promote blood flow. The puncture site was cleaned and air-dried and a sterile lancet was used to  
119 puncture the lateral plantar aspect of the newborn's heel. The first drop of blood was wiped away and 4-5  
120 drops of blood were applied within pre-printed circles of a second filter paper.

121

122 Heel and cord dried blood spot (DBS) cards were dried and stored at ambient temperature and shipped  
123 weekly to the Newborn Screening Ontario (NSO) laboratory at the Children's Hospital of Eastern Ontario in  
124 Ottawa, Canada for analysis, along with clinical and demographic information required for clinical  
125 interpretation of metabolic profiles and for metabolic GA estimation models. This information included  
126 infant sex, birthweight (in grams), multiple birth status, GA (in weeks + days), date of birth, and timing of  
127 sample collection.

128

#### 129 *Newborn screening analysis*

130 The newborn screening analysis process has been described in detail previously.<sup>17</sup> Dried blood spot samples  
131 were analyzed for the following metabolites: hemoglobin profiles, 17-hydroxyprogesterone (17-OHP),  
132 thyroid stimulating hormone (TSH), immunoreactive trypsinogen (IRT), a panel of 12 amino acids and  
133 31 acylcarnitines, t-cell receptor excision circles (TREC), biotinidase activity, and galactose-1-  
134 phosphate uridylyltransferase activity (Table 1). Real-time screening for three conditions [congenital  
135 hypothyroidism (CH), hemoglobinopathies, and medium-chain acyl-CoA dehydrogenase deficiency  
136 (MCADD)] occurred during this study. These conditions were deemed to be high priority for reporting and  
137 were treatable at the local collection sites. Results of screening for congenital metabolic conditions will be  
138 published elsewhere.

139

140 *Data preparation and statistical analysis*

141 All analyses were conducted using SAS 9.4 and R 3.3.2. Data preparation steps, including standardization  
142 and log transformations are detailed in S1 Appendix.

143

144 Analytes were included as candidate predictors in GA estimation models based on their routine measurement  
145 as part of Ontario's expanded newborn screening program, including hemoglobin profiles, amino acids,  
146 acylcarnitines, hormone and endocrine markers, enzymes and co-enzymes (Table 1). Newborn GA was  
147 estimated from models derived using multivariable regression coupled with elastic net regularization and  
148 including the following covariates:

- 149 1. Model 1: Birth weight, sex, multiple birth status and pairwise interactions.
- 150 2. Model 2: Birth weight, sex, multiple birth status and newborn screening analytes and pairwise  
151 interactions.

152

153 **Table 1. Newborn screening analytes included in predictive models**

|                          |                                                                                                                                                                                                                  |
|--------------------------|------------------------------------------------------------------------------------------------------------------------------------------------------------------------------------------------------------------|
| <b>Hemoglobins</b>       | Adult hemoglobin: HbA(A)<br>Fetal hemoglobin: HbF (F), Acetylated HbF (F1)                                                                                                                                       |
| <b>Endocrine markers</b> | 17-hydroxyprogesterone (17-OHP), Thyroid stimulating hormone (TSH)                                                                                                                                               |
| <b>Amino Acids</b>       | Arginine (arg); phenylalanine (phe); alanine (ala); leucine (leu); ornithine (orn); citruline (cit); tyrosine (tyr); glycine (gly); methionine (met); valine (val);                                              |
| <b>Acyl-carnitines</b>   | C0; C2; C3; C4; C5; C5:1; C6; C8; C8:1; C10; C10:1; C12; C12:1; C14; C14:1; C14:2; C16; C18; C18:1; C18:2; C10:1; C12:1; C14:1; C14:2; C4OH; C5:1; C5DC; C5OH; C6DC; C16:OH; C16:1OH; C18OH; C18:1OH; C3DC; C4DC |
| <b>Enzyme markers</b>    | Biotinidase; immunotripsinogen; galactose-1-phosphate uridylyltransferase (GALT)                                                                                                                                 |
| <b>T-cell Function</b>   | T-Cell Receptor Excision Circles (TREC)                                                                                                                                                                          |

154

155 Models were trained and internally validated in independent training and validation/test cohorts of infants  
156 from Ontario, Canada (S1 Appendix). These pretrained models were then applied to the data for infants from  
157 the external cohorts to estimate GA. To evaluate model accuracy, GA estimates were compared to the  
158 ultrasound reference GA for each infant, and the residual error calculated. Different metrics were calculated  
159 to estimate model uncertainty, including mean square error (MSE), standard error of estimation [also known  
160 as root mean square error (RMSE)], and mean absolute error (MAE), which is the average of the absolute  
161 value of the residual across all subjects (or subsets of subjects). Additionally, we calculated the proportion of  
162 model-derived estimates that fell within  $\pm 1$  week of reference GA. MAE was the main performance metric  
163 used to evaluate model accuracy, but multiple metrics were calculated and reported to facilitate comparisons

164 to other models developed by our group and others. Model-derived frequency of preterm birth will be  
165 compared to the observed prevalence of preterm birth.

166

167

## 168 **Results**

169 1,039 newborns had heel prick samples available, as well as clinical and demographic data including  
170 ultrasound-derived reference GA. Of these, 92 infants (8.9%) were preterm and 88 (8.5%) were SGA (Table  
171 2). 1,012 newborns (97.4%) also had a cord blood sample collected. It should be noted that the Ontario  
172 cohort in which the models were developed and internally validated had a lower preterm birth prevalence of  
173 5.6% and SGA prevalence of 3.9% (Table 2).

174

### 175 Model-based GA estimation for heel prick samples

176 Overall, Model 1, which included only readily available clinical covariates (sex, birthweight and multiple  
177 birth status) estimated GA within 10.5 days on average, with a MAE of 1.5 (95% CI 1.41, 1.58) weeks.  
178 58.5% of model estimates were within  $\pm 1$  week of reference GA. For preterm births, Model 1 MAE was  
179 2.64 (95% CI 2.30,3.01) weeks and only 24.1% of estimates were within  $\pm 1$  week of reference GA. In SGA  
180 newborns, MAE was 3.13 (95% CI 2.85, 3.38) weeks and 3.4% of estimates were within  $\pm 1$  week of  
181 reference GA (Table 2). Model 2, which included clinical covariates plus analytes, estimated GA within 9.5  
182 days overall, with a MAE of 1.35 (95% CI 1.27, 1.43) weeks, and 64.1% of estimates were within  $\pm 1$  week  
183 of reference GA. In preterm infants, MAE was 2.62 (95% CI 2.28, 2.99) weeks and in SGA infants the MAE  
184 was 1.81 (95% CI 1.57, 2.07) weeks (Table 3).

185

186 The performance of Models 1 and 2 did not appear to be affected by the HIV status of the mother. Results for  
187 subjects with HIV-positive mothers (n=197) were almost identical to model performance for infants of HIV-  
188 negative mothers (n=842) (Table 4).

189

### 190 Model-based GA estimation for cord-blood samples

191 Model 1 demonstrated nearly identical performance in cord blood samples compared to heel prick samples,  
192 as analytes were not covariates in Model 1, and the heel and cord blood cohorts were almost entirely  
193 comprised of the same infants. Overall, in the cord blood cohort, Model 2 had a MAE of 1.44 (95% CI 1.36,  
194 1.53) weeks. In preterm infants, Model 2 had a MAE of 2.79 (95% CI 2.46, 3.12) weeks and in SGA infants  
195 the MAE was 2.06 (95% CI 1.76, 2.36) weeks (Table 2). Like the heel prick results, model performance was  
196 not sensitive to the HIV status of the mother (Table 5 and Table 6).

197

### 198 Model-based GA estimation using reference GA derived from ultrasounds within recommended window

199 There was significant variation in the timing of gestational dating ultrasound, despite best efforts to conduct  
200 the ultrasound as early as possible. Reference GA for 28 newborns (2.7%) was derived from ultrasound  
201 conducted before 9 weeks' gestation, and 889 (85.6%) had reference GA based on an ultrasound later than

202 13 weeks' gestation. Only 120 newborns (11.5%) had reference GA based on an ultrasound conducted within  
203 9-13 weeks' gestation (Table 4). When evaluated in these 120 newborns, model performance was markedly  
204 better, with Model 2 having a MAE of 1.04 (95% CI 0.87, 1.22) weeks overall and a MAE of 2.56 (95% CI  
205 1.50, 4.00) and 1.07 (95% CI 0.46, 1.70) weeks in preterm and SGA infants, respectively (Table 5).

206

207 Similar to the heel prick results, Model 2 for cord blood specimens performed markedly better when only  
208 samples with reference GA ascertained between 9 and 13 weeks of gestation were included [overall MAE  
209 1.08 (95% CI 0.90, 1.27) weeks] (Table 5).

210

## 211 **Discussion**

212 We externally validated the performance of a postnatal GA dating algorithm developed and validated in a  
213 cohort of infants in Ontario, Canada in a prospective birth cohort in Siaya County Kenya, a lower-middle-  
214 income sub-Saharan African country. Heel prick and umbilical cord blood samples were collected shortly  
215 after birth, and ultrasound was used to provide a reference GA for each infant. Overall, model performance  
216 was worse in the Kenya birth cohort for Model 1 and Model 2 compared to internally validated model  
217 performance in Ontario, and in comparison to previously published external validations of metabolic GA  
218 algorithms.<sup>12,13</sup> The heterogeneity of reference ultrasound timing was an important contributor to diminished  
219 model performance, as only 120 out of 1,039 participants had reference ultrasound completed between 9 and  
220 13 weeks of gestation. Model performance was markedly better in participants with reference GA  
221 ascertained inside compared to outside the recommended window. For example, Model 2 had an overall  
222 MAE of 1.04 weeks among infants with reference GA between 9 and 13 weeks, compared to MAEs of 1.48  
223 (<9 weeks), 1.34 (14-20 weeks) and 1.43 (>20 weeks) weeks for those with dating ultrasounds earlier and  
224 later than the recommended window. A similar pattern was seen for Model 1 and Model 2 in heel and cord  
225 samples both overall and in preterm and SGA newborns. Our study highlights the challenges in reliably  
226 estimating GA in low resource settings, even in those with access to dating ultrasound, given that the timing  
227 of dating ultrasound is critical to accurate estimations of GA.<sup>3,18</sup> Indeed, most pregnant women in Kenya  
228 access ANC for the first time in the second trimester<sup>19</sup>. These challenges further underscore the need for  
229 novel, reliable GA estimation methods that can be adopted in LMICs.

230

231 Given the significant barriers to obtaining an early dating ultrasound, the metabolic GA approach may be a  
232 more feasible and accurate approach to GA dating than dating ultrasound when the timing of the latter is  
233 variable. Our study also demonstrated the utility of cord blood samples, which could further strengthen the  
234 feasibility of our approach in low resource settings. Cord blood samples are obtained shortly after birth and  
235 remove the burden of sample collection before discharge, do not cause any discomfort to the newborn and  
236 may be more readily accepted by parents who are not accustomed to the heel prick procedure. Given the  
237 higher prevalence of HIV in our patient population, our results also provide reassurance that HIV positive  
238 status does not appear to impact performance of algorithms based only on clinical measurements (Model 1)  
239 or those including metabolic markers measured in heel prick or cord blood (Model 2).

240

241 The major limitation of our study was the small number of GA ultrasounds conducted during the optimal  
242 reference time-period. Therefore, a gold standard for reliable comparison with accurate true GA was not  
243 possible for a large percentage of the sample. Strengths of the study include the real-world approach to  
244 evaluating the algorithm, allowing us to assess not only model performance but the feasibility of this GA  
245 estimation approach as well.

246

247 Our study demonstrated that, despite being conducted within a prospective pregnancy cohort with a well-  
248 defined protocol in a controlled research setting, there were still challenges in obtaining a true reference GA  
249 measurement. The results of this evaluation suggest that postnatal GA estimation algorithms such as the ones  
250 we have developed are both feasible and accurate, and previous analyses have indicated that GA estimation  
251 algorithm approaches are also potentially cost-effective.<sup>20</sup> Therefore, we believe that GA estimation  
252 algorithms based on metabolic analysis of heel prick or cord blood DBS may be able to serve an important  
253 role in both individual infant estimates of GA and population level estimations of preterm birth rates.  
254 Algorithm-based GA estimates have potential even in settings where early ultrasound is available, given the  
255 substantial heterogeneity in timing of reference GA ultrasound in our population, a factor that may  
256 compromise the accuracy of estimates based on ultrasound alone. Given these findings, we believe that GA  
257 estimation algorithms may serve an important role in providing both individual estimates of GA and  
258 population-level estimates of preterm birth.

259

260

## 261 **Acknowledgements**

262 This research was supported by the Bill & Melinda Gates Foundation (OHRI: OPP1184574; Stanford:  
263 OPP1182996).

## 264 **Contributions**

265 Conceptualization KW, GLD, VW, PC, NO; Data Curation BON, RA, ABB, RD, ML; Formal Analysis SH;  
266 Funding Acquisition KW, GLD, VW; Investigation NO, SM, BON, RA, ABB, LM, LAW; Methodology  
267 VW, KW, GLD, PC, ML, LAW; Project Administration ABB, ML, LM, VW, NO, RA; Resources NO, LM,  
268 ML, VW, RA BON; Software SH; Supervision KW, GLD, VW, NO; Writing -original Draft preparation-  
269 ABB, SH, RD; Writing-review and editing- all authors reviewed and edited the manuscript.

270

271

## 272 **References**

- 273 1. World Health Organization. *Born Too Soon: The Global Action Report on Preterm Birth.*;  
274 2012. doi:[http://whqlibdoc.who.int/publications/2012/9789241503433\\_eng.pdf](http://whqlibdoc.who.int/publications/2012/9789241503433_eng.pdf)
- 275 2. Blencowe H, Cousens S, Chou D, et al. Born Too Soon : The global epidemiology of 15  
276 million preterm births Understanding the data Preterm birth -- what is it ? Defining preterm  
277 birth. 2013;10(Suppl 1):1-13. doi:10.1186/1742
- 278 5. Hoffman CS, Messer LC, Mendola P, Savitz DA, Herring AH, Hartmann KE. Comparison of  
279 gestational age at birth based on last menstrual period and ultrasound during the first



- 280 trimester. *Paediatr Perinat Epidemiol.* 2008;22(6):587-596. doi:10.1111/j.1365-  
 281 3016.2008.00965.x  
 282 19. Nyiro JU, Bukusi E, Mwaengo D, et al. Implications of gestational age at antenatal care  
 283 attendance on the successful implementation of a maternal respiratory syncytial virus (RSV)  
 284 vaccine program in coastal Kenya. *BMC Public Health.* 2020;20(1). doi:10.1186/S12889-  
 285 020-09841-9  
 286 20. Coyle K, Quan AML, Wilson LA, et al. Cost-effectiveness of a gestational age metabolic  
 287 algorithm for preterm and small-for-gestational-age classification. *Am J Obstet Gynecol*  
 288 *MF.* 2021;3(1):100279. doi:10.1016/j.ajogmf.2020.100279  
 289  
 290

291  
 292

**Table 2. Cohort Characteristics**

|                                                 | <b>Canada</b><br>n=39, 666<br>(Ontario test cohort) | <b>Kenya Heel Prick</b><br>n=1,039 | <b>Kenya Cord Blood</b><br>n=1,012 |
|-------------------------------------------------|-----------------------------------------------------|------------------------------------|------------------------------------|
| <b>Sex, n(%)</b>                                |                                                     |                                    |                                    |
| Male                                            | 19,536 (49.3%)                                      | 526 (50.6%)                        | 511 (50.5%)                        |
| Female                                          | 20,130 (50.5%)                                      | 513 (49.4%)                        | 501 (49.5%)                        |
| <b>Birth weight (g), mean ± SD</b>              |                                                     |                                    |                                    |
| Overall                                         | 3,379 ± 530.2                                       | 3,238.4 ± 468.9                    | 3,238.5 ± 470.1                    |
| Term infants only                               | 3,430.6 ± 476.1                                     | 3,277.1 ± 430.6                    | 3,274.6 ± 435.1                    |
| Preterm infants only                            | 2,504.1 ± 622.8                                     | 2,840.0 ± 635.4                    | 2869.0 ± 632.5                     |
| <b>Low birth weight (&lt;2500 g), n (%)</b>     | 1,812 (4.6%)                                        | 48 (4.6%)                          | 46 (4.6%)                          |
| <b>SGA (&lt;10th Centile), n (%)</b>            | 1,561 (3.94%)                                       | 88 (8.5%)                          | 87 (8.6%)                          |
| <b>SGA (&lt;3rd Centile), n (%)</b>             | 363 (0.92%)                                         | 28 (2.7%)                          | 30 (3.0%)                          |
| <b>Completed gestational age wks, mean ± SD</b> | 39.3±1.6                                            | 39.1 ±1.9                          | 39.1±1.9                           |
| Term (≥37 wks), n (%)                           | 37,440 (94.4%)                                      | 947 (91.1%)                        | 922 (91.1%)                        |
| Late Preterm (32-36 wks), n (%)                 | 2,049 (5.2%)                                        | 88 (8.5%)                          | 86 (8.5%)                          |
| Very Preterm (28-31 wks), n (%)                 | 126 (0.3%)                                          | 4 (0.4%)                           | 4 (0.4%)                           |
| Extremely Preterm (<28 wks), n (%)              | 51 (0.1%)                                           | 0                                  | 0                                  |

293 SGA, small for gestational age (lowest 10 and 3 centiles within gestational age and sex strata,  
 294 calculated in the Ontario cohort using Intergrowth-21 centiles and applied uniformly in the Ontario,  
 295 China and Philippines cohorts)  
 296  
 297

**Table 3. Summary of model performance to estimate gestational age in samples from Kenya**

| Models                                         | Kenya Heel Prick Samples |                   |                   | Kenya Cord Blood Samples |                   |                   |
|------------------------------------------------|--------------------------|-------------------|-------------------|--------------------------|-------------------|-------------------|
|                                                | Overall, N=1,039         | Preterm, N=93     | SGA, N=88         | Overall, N=1,012         | Preterm, N=91     | SGA, N=87         |
| <b>Model 1: Sex and birth weight</b>           |                          |                   |                   |                          |                   |                   |
| MAE (CI)                                       | 1.50 (1.41, 1.58)        | 2.64 (2.30, 3.01) | 3.13 (2.85, 3.38) | 1.51 (1.42, 1.59)        | 2.70 (2.39, 3.04) | 3.17 (2.91, 3.46) |
| RMSE (CI)                                      | 2.02 (1.91, 2.13)        | 3.09 (2.75, 3.45) | 3.39 (3.06, 3.70) | 2.04 (1.94, 2.16)        | 3.14 (2.84, 3.49) | 3.43 (3.10, 3.77) |
| % +/-1 wk (CI)                                 | 58.5 (55.3, 61.6)        | 24.1 (14.5, 34.1) | 3.4 (0.0, 7.7)    | 58.4 (55.4, 61.6)        | 23.4 (13.7, 32.0) | 3.6 (0.0, 8.3)    |
| <b>Model 2: Sex, Birth weight and analytes</b> |                          |                   |                   |                          |                   |                   |
| MAE (CI)                                       | 1.35 (1.27, 1.43)        | 2.62 (2.28, 2.99) | 1.81 (1.57, 2.07) | 1.44 (1.36, 1.53)        | 2.79 (2.46, 3.12) | 2.06 (1.76, 2.36) |
| RMSE (CI)                                      | 1.83 (1.72, 1.94)        | 3.09 (2.74, 3.48) | 2.18 (1.91, 2.46) | 1.95 (1.85, 2.06)        | 3.19 (2.85, 3.57) | 2.41 (2.13, 2.69) |
| % +/-1 wk (CI)                                 | 64.1 (61.1, 67.2)        | 29.4 (20.2, 38.9) | 46.9 (35.8, 57.3) | 61.2 (58.3, 63.9)        | 21.1 (11.8, 29.3) | 33.2 (23.0, 44.6) |

MAE: Mean absolute error; RMSE: Root mean square error; SGA: small for gestational age  
Data are presented as the mean and 2.5th and 97.5th bootstrap percentiles for MAE, RMSE and the percentage of model estimates within 1 and 2 weeks of ultrasound GA for 1000 bootstrap samples generated from each cohort.

**Table 4. Summary of model performance to estimate gestational age in heel prick samples according to HIV status and timing of GA dating ultrasound**

|                                                              | Kenya Heel Prick Samples |                   |                   |                      |                       |                     |
|--------------------------------------------------------------|--------------------------|-------------------|-------------------|----------------------|-----------------------|---------------------|
|                                                              | HIV Neg, N=842           | HIV Pos, N=197    | US <9 weeks, N=28 | US 9-13 weeks, N=120 | US 14-20 weeks, N=503 | US >20 weeks, N=386 |
| <b>Model 1: Sex, birthweight multiple birth</b>              |                          |                   |                   |                      |                       |                     |
| MAE (CI)                                                     | 1.49 (1.39, 1.57)        | 1.56 (1.37, 1.74) | 1.51 (1.11, 1.93) | 1.27 (1.08, 1.45)    | 1.57 (1.45, 1.69)     | 1.48 (1.33, 1.64)   |
| RMSE (CI)                                                    | 2.01 (1.89, 2.13)        | 2.06 (1.81, 2.31) | 1.89 (1.53, 2.29) | 1.61 (1.40, 1.83)    | 2.07 (1.92, 2.23)     | 2.08 (1.89, 2.28)   |
| % +/-1 wk (CI)                                               | 58.1 (54.8, 61.7)        | 60.4 (53.9, 67.0) | 49.6 (32.1, 67.7) | 68.6 (60.2, 76.3)    | 55.5 (51.0, 60.0)     | 60.0 (54.6, 65.0)   |
| <b>Model 2: Sex, birthweight multiple birth and analytes</b> |                          |                   |                   |                      |                       |                     |
| MAE (CI)                                                     | 1.34 (1.27, 1.43)        | 1.35 (1.16, 1.53) | 1.48 (1.09, 1.90) | 1.04 (0.87, 1.22)    | 1.34 (1.23, 1.46)     | 1.43 (1.31, 1.58)   |
| RMSE (CI)                                                    | 1.81 (1.70, 1.93)        | 1.93 (1.67, 2.20) | 1.85 (1.46, 2.23) | 1.38 (1.19, 1.58)    | 1.84 (1.68, 2.00)     | 1.94 (1.77, 2.13)   |
| % +/-1 wk (CI)                                               | 63.7 (60.5, 66.9)        | 65.7 (59.5, 72.0) | 49.6 (29.6, 66.7) | 71.5 (63.3, 79.1)    | 64.5 (59.8, 68.9)     | 62.2 (56.8, 66.8)   |

MAE: Mean absolute error; RMSE: Root mean square error; SGA: small for gestational age  
Data are presented as the mean and 2.5th and 97.5th bootstrap percentiles for MAE, RMSE and the percentage of model estimates within 1 and 2 weeks of ultrasound GA for 1000 bootstrap samples generated from each cohort.

**Table 5. Summary of model performance in Cord Blood Samples According to HIV Status and Timing of GA Dating Ultrasound (US)**

| Models                                                         | HIV Neg, N=822    | HIV Pos, N=190    | US <9 weeks, N=27 | US 9-13 weeks, N=121 | US 14-20 weeks, N=494 | US >20 weeks, N=370 |
|----------------------------------------------------------------|-------------------|-------------------|-------------------|----------------------|-----------------------|---------------------|
| <b>Model 1: Sex, birthweight and multiple birth</b>            |                   |                   |                   |                      |                       |                     |
| <i>MAE (CI)</i>                                                | 1.49 (1.41, 1.59) | 1.56 (1.37, 1.76) | 1.41 (0.96, 1.89) | 1.28 (1.10, 1.45)    | 1.58 (1.46, 1.71)     | 1.48 (1.33, 1.63)   |
| <i>RMSE (CI)</i>                                               | 2.03 (1.92, 2.15) | 2.08 (1.86, 2.34) | 1.84 (1.43, 2.26) | 1.63 (1.39, 1.84)    | 2.10 (1.94, 2.25)     | 2.09 (1.88, 2.27)   |
| <i>% +/-1 wk (CI)</i>                                          | 57.9 (54.3, 60.9) | 60.5 (53.3, 67.0) | 55.6 (35.7, 73.9) | 67.5 (59.2, 76.0)    | 55.0 (50.8, 59.4)     | 60.1 (54.7, 64.6)   |
| <b>Model 2: Sex, birthweight, multiple birth, and analytes</b> |                   |                   |                   |                      |                       |                     |
| <i>MAE (CI)</i>                                                | 1.43 (1.34, 1.52) | 1.49 (1.29, 1.70) | 1.60 (1.22, 2.03) | 1.08 (0.90, 1.27)    | 1.46 (1.33, 1.57)     | 1.53 (1.39, 1.66)   |
| <i>RMSE (CI)</i>                                               | 1.92 (1.81, 2.04) | 2.04 (1.80, 2.28) | 1.89 (1.49, 2.30) | 1.44 (1.25, 1.62)    | 1.99 (1.83, 2.14)     | 2.03 (1.87, 2.19)   |
| <i>% +/-1 wk (CI)</i>                                          | 61.4 (58.3, 64.4) | 60.4 (53.1, 67.6) | 55.4 (36.7, 73.1) | 70.5 (62.2, 78.2)    | 61.7 (57.5, 65.7)     | 57.9 (53.3, 62.6)   |

*MAE: Mean absolute error; RMSE: Root mean square error; SGA: small for gestational age*  
Data are presented as the mean and 2.5th and 97.5th bootstrap percentiles for MAE, RMSE and the percentage of model estimates within 1 and 2 weeks of ultrasound GA for 1000 bootstrap samples generated from each cohort.

**Table 6. Summary of model performance in heel and cord blood samples restricted to 9-13 week ultrasound.**

| Models                                                        | Kenya Heel Prick Samples |                   |                    | Kenya Cord Blood Samples |                   |                   |
|---------------------------------------------------------------|--------------------------|-------------------|--------------------|--------------------------|-------------------|-------------------|
|                                                               | Overall, N=120           | Preterm, N=5      | SGA, N=13          | Overall, N=120           | Preterm, N=5      | SGA, N=14         |
| <b>Model 1: Sex, birthweight and multiple birth</b>           |                          |                   |                    |                          |                   |                   |
| <i>MAE (CI)</i>                                               | 1.27 (1.08, 1.45)        | 2.80 (1.00, 4.50) | 2.47 (1.92, 3.00)  | 1.27 (1.08, 1.47)        | 2.82 (1.20, 4.33) | 2.52 (2.08, 3.00) |
| <i>RMSE (CI)</i>                                              | 1.61 (1.40, 1.83)        | 3.19 (1.41, 4.53) | 2.63 (2.02, 3.22)  | 1.62 (1.39, 1.87)        | 3.22 (1.73, 4.43) | 2.67 (2.17, 3.22) |
| <i>% +/-1 wk (CI)</i>                                         | 68.6 (60.2, 76.3)        | 18.8 (0.0, 60.0)  | 7.8 (0.0, 27.3)    | 67.6 (59.2, 76.7)        | 19.6 (0.0, 66.7)  | 7.5 (0.0, 25.0)   |
| <b>Model 2: Sex, birthweight, multiple birth and analytes</b> |                          |                   |                    |                          |                   |                   |
| <i>MAE (CI)</i>                                               | 1.04 (0.87, 1.22)        | 2.56 (1.50, 4.00) | 1.07 (0.46, 1.70)  | 1.07 (0.88, 1.23)        | 2.60 (1.00, 4.00) | 1.52 (0.88, 2.15) |
| <i>RMSE (CI)</i>                                              | 1.38 (1.19, 1.58)        | 2.78 (1.58, 4.00) | 1.44 (0.73, 2.02)  | 1.43 (1.24, 1.62)        | 2.94 (1.63, 4.00) | 1.90 (1.30, 2.37) |
| <i>% +/-1 wk (CI)</i>                                         | 71.5 (63.3, 79.1)        | 18.8 (0.0, 60.0)  | 77.0 (50.0, 100.0) | 71.0 (62.5, 79.2)        | 19.6 (0.0, 66.7)  | 49.4 (22.2, 75.0) |

*MAE: Mean absolute error; RMSE: Root mean square error; SGA: small for gestational age*  
Data are presented as the mean and 2.5th and 97.5th bootstrap percentiles for MAE, RMSE and the percentage of model estimates within 1 and 2 weeks of ultrasound GA for 1000 bootstrap samples generated from each cohort.
